# Supplementary material for: The effect of black tea supplementation on blood pressure: a systematic review and dose–response meta-analysis of randomized controlled trials
Source: Royal Society of Chemistry journal article supplement (doi:10.1039/d0fo02122a), 2020-11-16
Supplement: d0fo02122a3.pdf [file d0fo02122a3.pdf]

Table S1 Meta-regression of the effect on blood pressure reduction of difference in matched caffeine and AMBP. Analyses are carried out for all study arms (n = 22), in univariate and multivariate analysis

|                  | SBP    |               |       |               | DBP    |                |      |               |
|------------------|--------|---------------|-------|---------------|--------|----------------|------|---------------|
|                  | Coeff. | 95%CI         | P     | Type I errors | Coeff. | 95%CI          | P    | Type I errors |
| Matched caffeine |        |               |       |               |        |                |      |               |
| Univariate       | -1.62  | (-3.70,.449)  | .118  |               | -1.72  | (-2.41,.068)   | .063 |               |
| Multivariate     | -3.09  | (-4.64,-1.54) | .001  | Not           | -1.70  | (-3.10,-0.293) | .020 | Not           |
| Use of AMBP      |        |               |       |               |        |                |      |               |
| Univariate       | -1.29  | (-3.02,.428)  | .133  |               | -.334  | (-1.57,.901)   | .578 |               |
| Multivariate     | -2.61  | (-3.53,-1.70) | <.001 | Not           | -1.04  | (-2.33,.235)   | .104 | Not           |
