# Supplementary figures and images for: The effect of black tea supplementation on blood pressure: a systematic review and dose–response meta-analysis of randomized controlled trials
Source: Royal Society of Chemistry journal article supplement (doi:10.1039/d0fo02122a), 2020-11-16

A

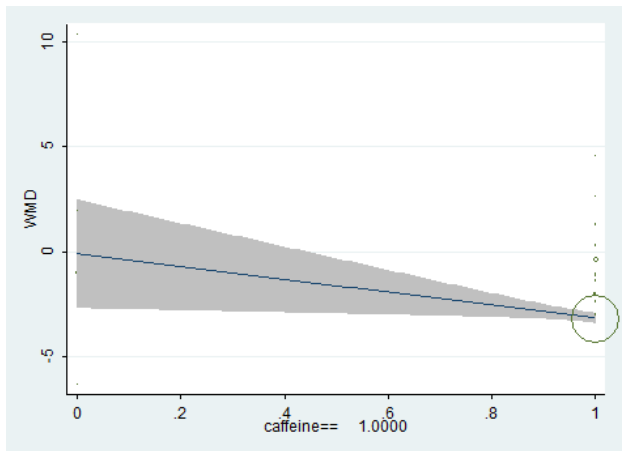

B

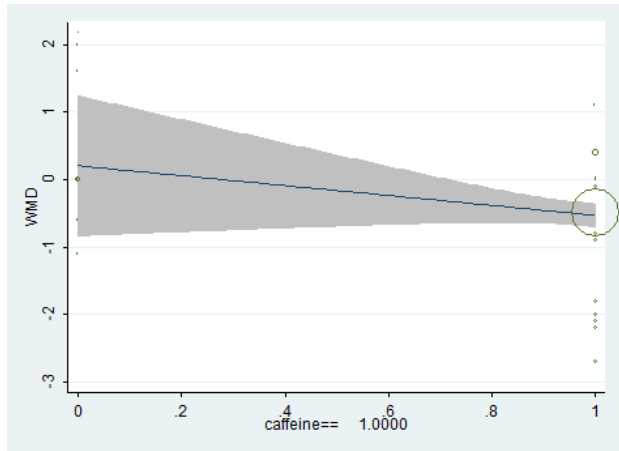

A

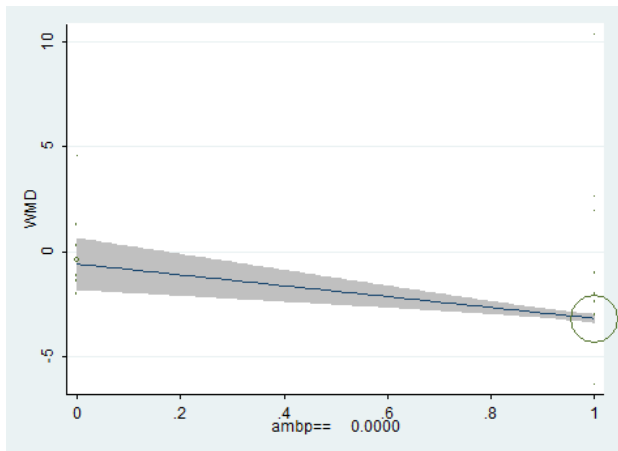

B

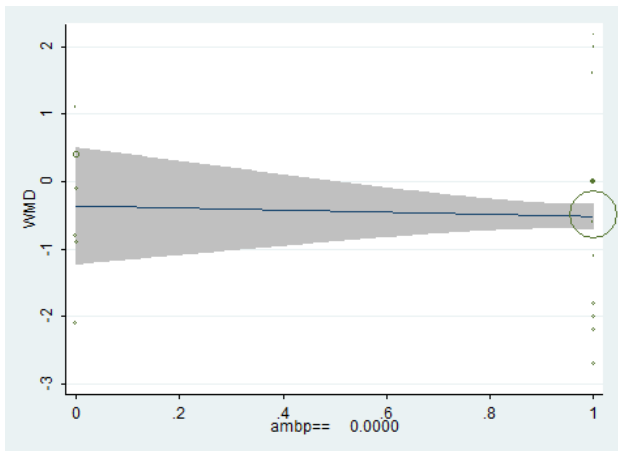

Supplement: d0fo02122a2.pdf [file d0fo02122a2.pdf]
